# Supplementary material
Source: Springer Nature journal article supplement (https://www.springermedizin.de/resource/supplementary/12879_2008_765_MOESM1_ESM.pdf/9449334)
Supplement: MOESM1 [file 9449334]

## Existing Practice

A Sporadic screening (existing practice)

## Alternatives

B Universal screening by 14 weeks gestation

C Universal screening at the onset of labour

D Universal screening of infants at birth

E Universal screening by 14 weeks gestation **OR** screening at the onset of labour

F Universal screening by 14 weeks gestation **OR** screening the infants at birth

G Universal screening at the onset of labour **OR** screening of infants at birth

H Universal screening by 14 weeks gestation **OR** screening at the onset of labour **OR** screening of infants at birth

I Universal screening by 14 weeks gestation **AND** screening at the onset of labour

J Universal screening by 14 weeks gestation **AND** screening of the infants at birth
